# Supplementary material
Source: MDPI journal article supplement (https://www.mdpi.com/2073-445X/10/2/195)
Supplement: s1 [file s1]

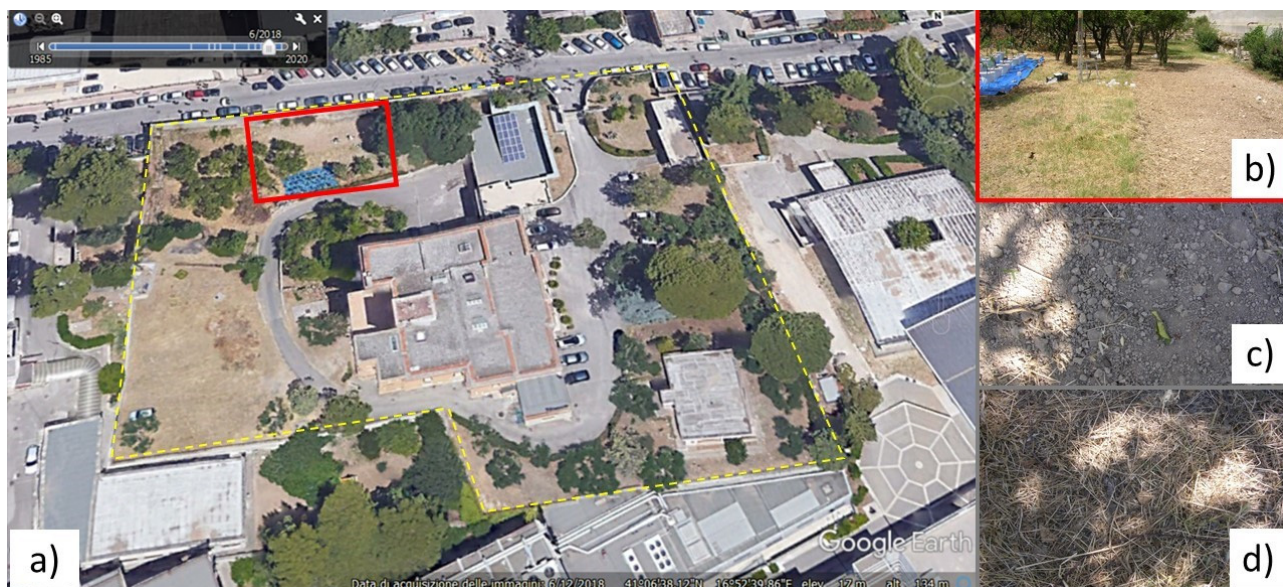

**Figure S1.** View of the experimental site at CREA-AA (outline in red) (a, b), details of the soil conditions at the time of the experiments under minimum tillage (c) and no-tillage (d).
